# Supplementary material for: Strategy to design a smart photocleavable and pH sensitive chitosan based hydrogel through a novel crosslinker: a potential vehicle for controlled drug delivery
Source: Royal Society of Chemistry journal article supplement (doi:10.1039/c9ra10333c), 2020-01-01
Supplement: c9ra10333c1.pdf [file c9ra10333c1.pdf]

## Strategy to Design a Smart Photocleavable and pH Sensitive Chitosan Based Hydrogel Through a Novel Crosslinker: A Potential Vehicle for Controlled Drug Delivery

Safiya Nisar,<sup>a</sup> Ashiq Hussain Pandit,<sup>b</sup> Li-Fang Wang,<sup>\*c,d</sup> Sunita Rattan<sup>\*a</sup>

<sup>a</sup>Amity Institute of Applied Sciences, Amity University, Sector-125, Noida 201303, India.

<sup>b</sup>Materials Research Laboratory, Department of Chemistry, Jamia Millia Islamia, New Delhi-110025- India

<sup>c</sup>Department of Medicinal and Applied Chemistry, College of Life Sciences, Kaohsiung Medical University, Kaohsiung 807, Taiwan.

<sup>d</sup>Department of Medical Research, Kaohsiung Medical University Hospital, Kaohsiung 807, Taiwan

<sup>a</sup>**Safiya Nisar**

**Email:** [snisar41@gmail.com](mailto:snisar41@gmail.com)

<sup>b</sup>**Ashiq Hussain Pandit**

**Email:** [panditashiq7@gmail.com](mailto:panditashiq7@gmail.com)

<sup>\*c,d</sup>**Li-Fang Wang**

**Email:** [lfwang@kmu.edu.tw](mailto:lfwang@kmu.edu.tw)

<sup>\*a</sup>**Sunita Rattan**

**Email:** [srattan@amity.edu](mailto:srattan@amity.edu)

**\*Corresponding Authors**

**Sunita Rattan**

**Li-Fang Wang**

## Supplementary Information

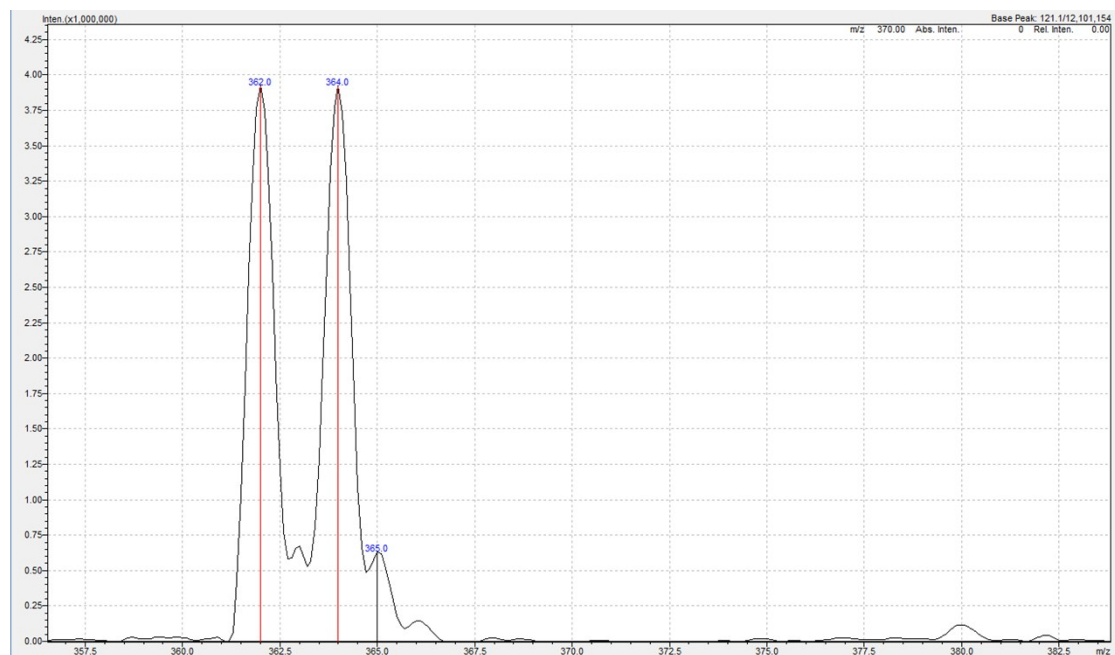

**Fig. S1.** LCMS spectrum of CHO-ONB-Br

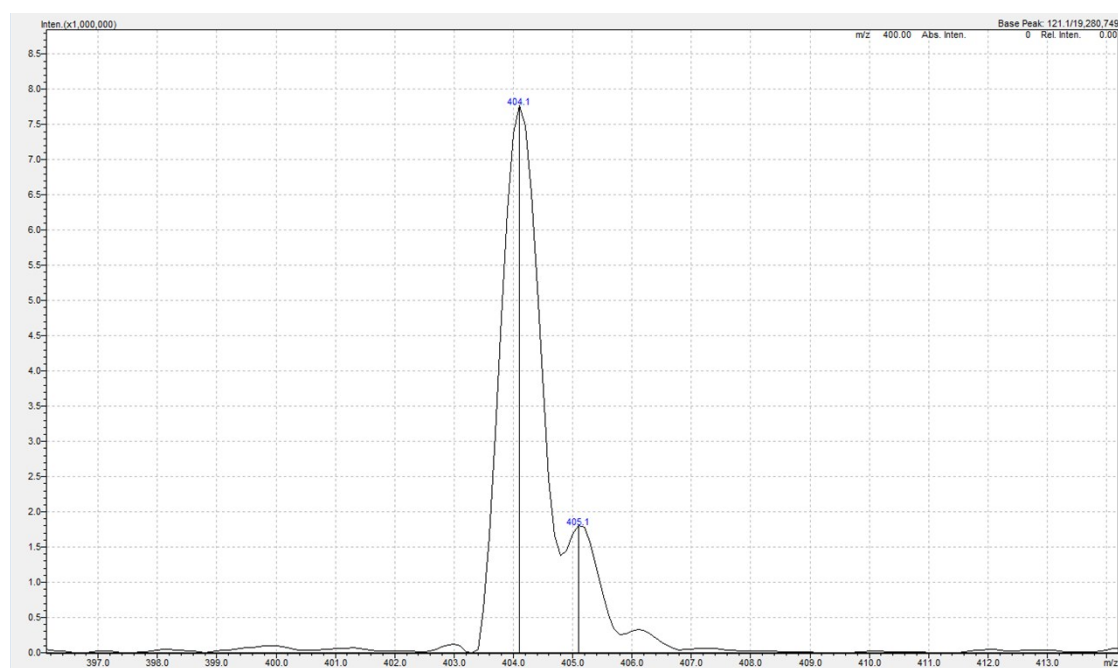

**Fig. S2.** LCMS spectrum of CHO-ONB-CHO

LCMS data was analyzed on Shimadzu, LCMS 8045 and the samples were dissolved in THF ( $1 \text{ mgml}^{-1}$ ). UV spot light source was used.

The LCMS data for -CHO-ONB-Br depicted the presence of characteristic bromine isotopic peaks<sup>36</sup> at 364 and 362 of equal intensity and the peaks for -CHO-ONB-CHO was confirmed at M/z 404.1, 405.1.
